# Supplementary material for: Bacillus subtilis PB6 based probiotic supplementation plays a role in the recovery after the necrotic enteritis challenge
Source: PubMed Central journal article supplement (PMC7302482; doi:10.1371/journal.pone.0232781), 2020-06-18
Supplement: pone.0232781.s001.pdf [file pone.0232781.s001.pdf]

**Table S1.** Ingredients and calculated nutrient analysis of broilers starter and finisher diets

| <b>Ingredients</b>                      | <b>Starter</b> | <b>Finisher</b> |
|-----------------------------------------|----------------|-----------------|
| Yellow corn                             | 50.635         | 65.39           |
| Soybean meal                            | 42.40          | 20.70           |
| Wheat bran                              | 0.00           | 0.60            |
| Corn Gluten meal                        | 0.00           | 0.70            |
| Choline chloride CL 60                  | 0.05           | 0.05            |
| Corn oil                                | 3.60           | 3.00            |
| Dicalcuim Phosphate<br>DCP              | 1.270          | 1.027           |
| Ground Limestone                        | 1.080          | 1.04            |
| Salt                                    | 0.300          | 0.30            |
| Phytase xp 10000 TPT                    | 0.005          | 0.005           |
| DL-methionine                           | 0.295          | 0.22            |
| Lysine-HCL                              | 0.080          | 0.36            |
| Threonine                               | 0.085          | 0.11            |
| Vitamin- Mineral<br>premix <sup>1</sup> | 0.200          | 0.200           |
| <b>Total</b>                            | <b>100</b>     | <b>100</b>      |
| <b>Analysis</b>                         |                |                 |
| ME, kcal/kg                             | 3000           | 3200            |
| Crude protein, %                        | 23.0           | 19.5            |
| Non phytate P, %                        | 0.48           | 0.359           |
| Calcium, %                              | 0.96           | 0.81            |
| D. Lysine, %                            | 1.28           | 1.03            |
| Sulfur amino acids, %                   | 0.85           | 0.8             |
| Threonine, %                            | 0.86           | 0.69            |

<sup>1</sup>Vitamin-mineral premix contains in the following per kg: vitamin A, 12000000 IU; vitamin D3, 5000000 IU; vitamin E, 80000 IU; vitamin K3, 3200 mg; vitamin B1, 3200 mg; vitamin B2, 8600 mg; vitamin B3, 65000 mg; pantothenic acid, 20000 mg; vitamin B6, 4300 mg; biotin 220 mg; antioxidant (BHA+BHT), 50000 mg; B9, 2200 mg; B12, 17 mg; copper, 16000 mg; iodine, 1250 mg; iron, 20000 mg; manganese, 120000 mg; selenium, 300 mg, and zinc, 110000 mg.
