# Supplementary material for: Bacillus subtilis PB6 based probiotic supplementation plays a role in the recovery after the necrotic enteritis challenge
Source: PubMed Central journal article supplement (PMC7302482; doi:10.1371/journal.pone.0232781), 2020-06-18
Supplement: pone.0232781.s002.pdf [file pone.0232781.s002.pdf]

**Table S2.** Effect of different dietary supplementation and bacterial challenges on ileum histomorphometric measurements of broilers at (40 d).

| <b>Treatment group</b>                                 | <b>Histomorphometric Measurements</b> |                    |                     |
|--------------------------------------------------------|---------------------------------------|--------------------|---------------------|
|                                                        | L                                     | W                  | SA                  |
|                                                        | ( $\mu\text{m}$ )                     | ( $\mu\text{m}$ )  | ( $\mu\text{m}$ )   |
| Negative Control, basal diet, unchallenged             | 624.8                                 | 75.9 <sup>ab</sup> | 0.147               |
| Positive Control, <i>C. perfringens</i> Challenge      | 566.3                                 | 75.6 <sup>ab</sup> | 0.142               |
| CloStat <sup>®</sup> , unchallenged                    | 609.1                                 | 88.8 <sup>a</sup>  | 0.171               |
| CloStat <sup>®</sup> , <i>C. perfringens</i> Challenge | 603.4                                 | 67.7 <sup>b</sup>  | 0.130               |
| <b>SEM<sup>1</sup></b>                                 | $\pm 20.9$                            | $\pm 5.39$         | $\pm 0.011$         |
| <b><i>p</i>-Value</b>                                  | 0.2431 <sup>NS</sup>                  | 0.052*             | 0.088 <sup>NS</sup> |

L: villus length; W: villi width; SA: surface area,<sup>1</sup> SEM: standard error of the mean <sup>abc</sup> Means values within a column with different superscripts are significantly different \*,  $P < 0.05$ ; \*\*,  $P < 0.01$ ; \*\*\*,  $P < 0.001$ , NS, not significant.
