# Supplementary material for: Bacillus subtilis PB6 based probiotic supplementation plays a role in the recovery after the necrotic enteritis challenge
Source: PubMed Central journal article supplement (PMC7302482; doi:10.1371/journal.pone.0232781), 2020-06-18
Supplement: pone.0232781.s003.pdf [file pone.0232781.s003.pdf]

**Table S3.** Results from Primer 7e 2-way PERMANOVA analysis at a phylum (A), genus (B) and an OTU level (C)

**Table 3A – Phylum level:** abbreviations Factor 1- NE challenge (Cp) and Factor 2 -probiotic additive (Ad)

**PERMANOVA**  
Permutational MANOVA

*Resemblance worksheet*  
Name: Resem2  
Data type: Similarity  
Selection: All  
Resemblance: S17 Bray-Curtis similarity

Sums of squares type: Type III (partial)  
Fixed effects sum to zero for mixed terms  
Permutation method: Permutation of residuals under a reduced model  
Number of permutations: 99999

*Factors*

| Name    | Abbrev. | Type  | Levels |
|---------|---------|-------|--------|
| Cp      | Cp      | Fixed | 2      |
| Aditive | Ad      | Fixed | 2      |

*PERMANOVA table of results*

| Source | df | SS     | MS     | Pseudo-F | P(perm) | Unique perms | P(MC)  |
|--------|----|--------|--------|----------|---------|--------------|--------|
| Cp     | 1  | 325.9  | 325.9  | 4.7139   | 0.0114  | 95736        | 0.0123 |
| Ad     | 1  | 61.781 | 61.781 | 0.89361  | 0.4206  | 95735        | 0.4188 |
| CpxAd  | 1  | 240.56 | 240.56 | 3.4795   | 0.0342  | 95740        | 0.0351 |
| Res    | 48 | 3318.5 | 69.136 |          |         |              |        |
| Total  | 51 | 3951.5 |        |          |         |              |        |

*Details of the expected mean squares (EMS) for the model*

| Source | EMS                        |
|--------|----------------------------|
| Cp     | 1*v(Res) + 25.923*s(Cp)    |
| Ad     | 1*v(Res) + 25.923*s(Ad)    |
| CpxAd  | 1*v(Res) + 12.961*s(CpxAd) |
| Res    | 1*v(Res)                   |

*Construction of Pseudo-F ratio(s) from mean squares*

| Source | Numerator | Denominator | Num. df | Den. df |
|--------|-----------|-------------|---------|---------|
| Cp     | 1*Cp      | 1*Res       | 1       | 48      |
| Ad     | 1*Ad      | 1*Res       | 1       | 48      |
| CpxAd  | 1*CpxAd   | 1*Res       | 1       | 48      |

*Estimates of components of variation*

| Source   | Estimate | Sq. root |
|----------|----------|----------|
| S(Cp)    | 9.905    | 3.1472   |
| S(Ad)    | -0.28375 | -0.53269 |
| S(CpxAd) | 13.225   | 3.6367   |
| V(Res)   | 69.136   | 8.3148   |

**Table 3B – Genus level:** abbreviations Factor 1- NE challenge (Cp) and Factor 2 -probiotic additive (Ad)

## PERMANOVA

### Permutational MANOVA

#### *Resemblance worksheet*

Name: Resem1

Data type: Similarity

Selection: All

Resemblance: S17 Bray-Curtis similarity

Sums of squares type: Type III (partial)

Fixed effects sum to zero for mixed terms

Permutation method: Permutation of residuals under a reduced model

Number of permutations: 99999

#### *Factors*

| Name    | Abbrev. | Type  | Levels |
|---------|---------|-------|--------|
| Cp      | Cp      | Fixed | 2      |
| Aditive | Ad      | Fixed | 2      |

#### *PERMANOVA table of results*

| Source | df | SS     | MS     | Pseudo-F | P(perm) | Unique perms | P(MC)  |
|--------|----|--------|--------|----------|---------|--------------|--------|
| Cp     | 1  | 456.67 | 456.67 | 1.987    | 0.064   | 93875        | 0.071  |
| Ad     | 1  | 404.26 | 404.26 | 1.759    | 0.0981  | 93880        | 0.1043 |
| CpxAd  | 1  | 316.31 | 316.31 | 1.3763   | 0.1969  | 93966        | 0.2008 |
| Res    | 48 | 11032  | 229.83 |          |         |              |        |
| Total  | 51 | 12202  |        |          |         |              |        |

#### *Details of the expected mean squares (EMS) for the model*

| Source | EMS                                            |
|--------|------------------------------------------------|
| Cp     | $1 * v(\text{Res}) + 25.923 * S(\text{Cp})$    |
| Ad     | $1 * v(\text{Res}) + 25.923 * S(\text{Ad})$    |
| CpxAd  | $1 * v(\text{Res}) + 12.961 * S(\text{CpxAd})$ |
| Res    | $1 * v(\text{Res})$                            |

#### *Construction of Pseudo-F ratio(s) from mean squares*

| Source | Numerator | Denominator | Num. df | Den. df |
|--------|-----------|-------------|---------|---------|
| Cp     | 1 * Cp    | 1 * Res     | 1       | 48      |
| Ad     | 1 * Ad    | 1 * Res     | 1       | 48      |
| CpxAd  | 1 * CpxAd | 1 * Res     | 1       | 48      |

#### *Estimates of components of variation*

| Source   | Estimate | Sq. root |
|----------|----------|----------|
| S(Cp)    | 8.7508   | 2.9582   |
| S(Ad)    | 6.729    | 2.594    |
| S(CpxAd) | 6.6719   | 2.583    |
| V(Res)   | 229.83   | 15.16    |

**Table 3C – an OTU level:** abbreviations Factor 1- NE challenge (Cp) and Factor 2 -probiotic additive (Ad)

**PERMANOVA**  
Permutational MANOVA

*Resemblance worksheet*  
Name: Resem3  
Data type: Similarity  
Selection: All  
Resemblance: S17 Bray-Curtis similarity

Sums of squares type: Type III (partial)  
Fixed effects sum to zero for mixed terms  
Permutation method: Permutation of residuals under a reduced model  
Number of permutations: 99999

*Factors*

| Name    | Abbrev. | Type  | Levels |
|---------|---------|-------|--------|
| Cp      | Cp      | Fixed | 2      |
| Aditive | Ad      | Fixed | 2      |

*PERMANOVA table of results*

| Source | df | SS     | MS     | Pseudo-F | P(perm) | Unique perms | P(MC)  |
|--------|----|--------|--------|----------|---------|--------------|--------|
| Cp     | 1  | 2562.2 | 2562.2 | 1.7576   | 0.0079  | 87709        | 0.023  |
| Ad     | 1  | 2012.1 | 2012.1 | 1.3802   | 0.0651  | 87697        | 0.1088 |
| CpxAd  | 1  | 2181.3 | 2181.3 | 1.4963   | 0.032   | 87667        | 0.069  |
| Res    | 48 | 69976  | 1457.8 |          |         |              |        |
| Total  | 51 | 76725  |        |          |         |              |        |

*Details of the expected mean squares (EMS) for the model*

| Source | EMS                                                    |
|--------|--------------------------------------------------------|
| Cp     | $1 \cdot V(\text{Res}) + 25.923 \cdot S(\text{Cp})$    |
| Ad     | $1 \cdot V(\text{Res}) + 25.923 \cdot S(\text{Ad})$    |
| CpxAd  | $1 \cdot V(\text{Res}) + 12.961 \cdot S(\text{CpxAd})$ |
| Res    | $1 \cdot V(\text{Res})$                                |

*Construction of Pseudo-F ratio(s) from mean squares*

| Source | Numerator | Denominator | Num. df | Den. df |
|--------|-----------|-------------|---------|---------|
| Cp     | 1*Cp      | 1*Res       | 1       | 48      |
| Ad     | 1*Ad      | 1*Res       | 1       | 48      |
| CpxAd  | 1*CpxAd   | 1*Res       | 1       | 48      |

*Estimates of components of variation*

| Source   | Estimate | Sq. root |
|----------|----------|----------|
| S(Cp)    | 42.604   | 6.5271   |
| S(Ad)    | 21.382   | 4.624    |
| S(CpxAd) | 55.819   | 7.4712   |
| V(Res)   | 1457.8   | 38.182   |
