# Supplementary material for: Bacillus subtilis PB6 based probiotic supplementation plays a role in the recovery after the necrotic enteritis challenge
Source: PubMed Central journal article supplement (PMC7302482; doi:10.1371/journal.pone.0232781), 2020-06-18
Supplement: pone.0232781.s004.pdf [file pone.0232781.s004.pdf]

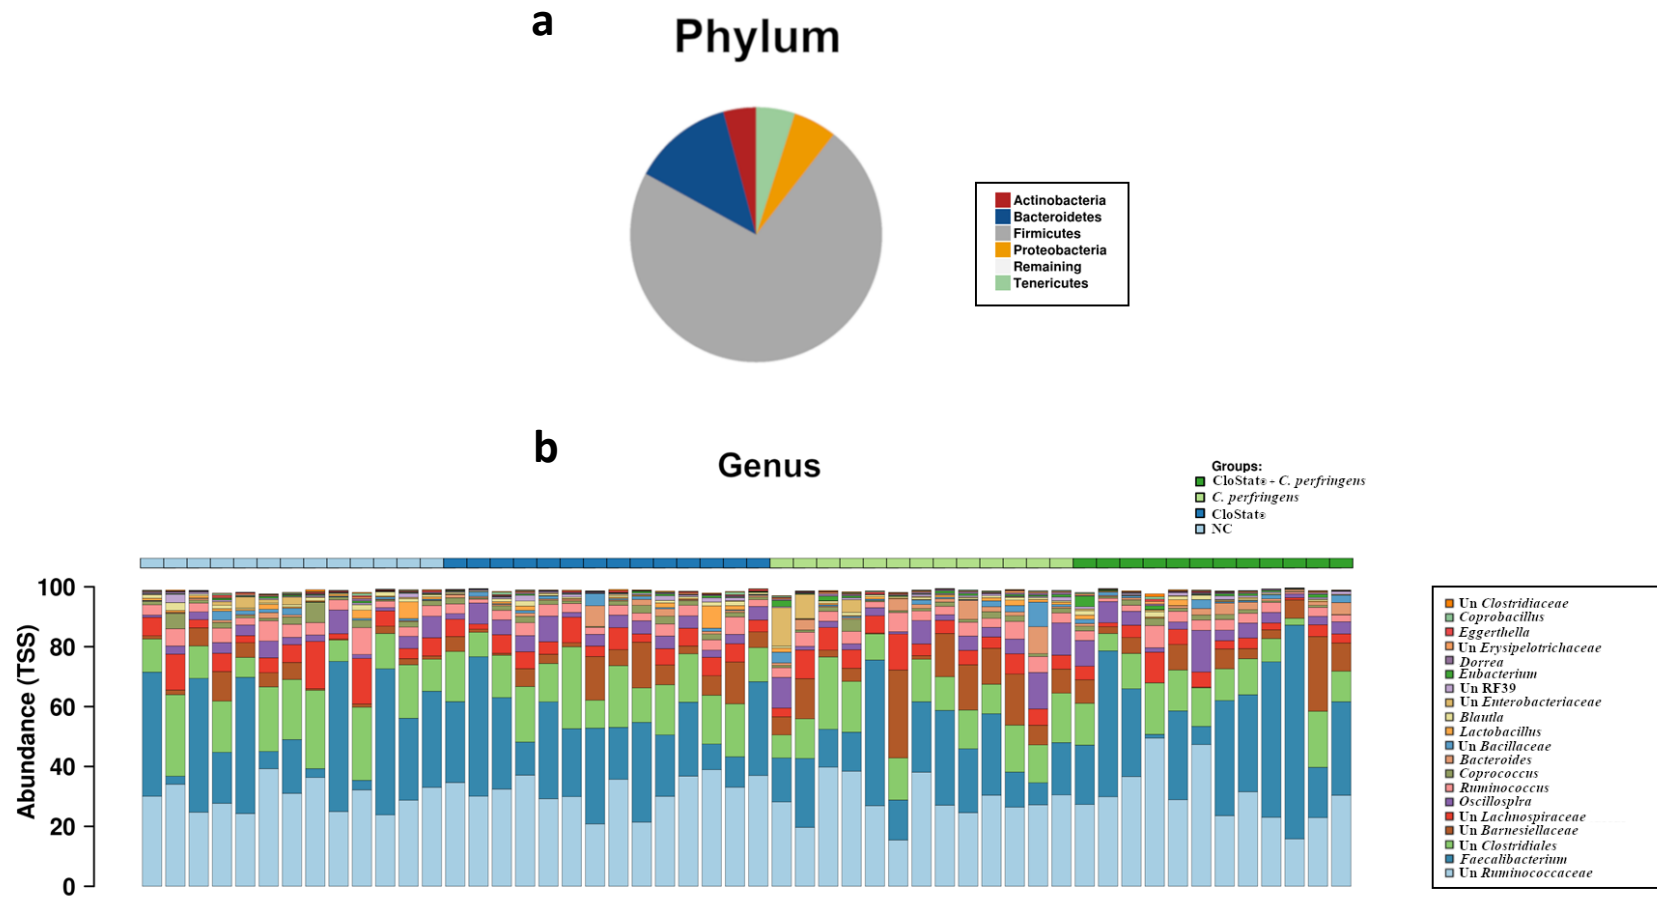

**Fig. S1:** Cecal microbiota composition of broilers within different groups; (A) the most dominant phyla, and (B) the 20 most abundant genera.
