# Supplementary material for: Bacillus subtilis PB6 based probiotic supplementation plays a role in the recovery after the necrotic enteritis challenge
Source: PubMed Central journal article supplement (PMC7302482; doi:10.1371/journal.pone.0232781), 2020-06-18
Supplement: pone.0232781.s006.pdf [file pone.0232781.s006.pdf]

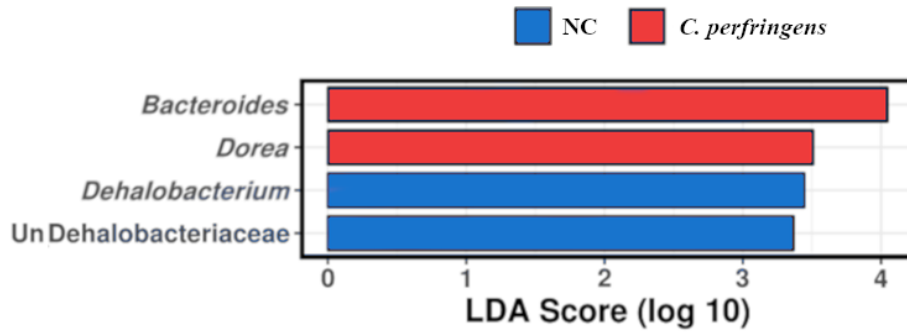

**Fig. S3:** Linear discriminant analysis and effect size method (LEfSe) showing the genera that is most likely to describe the differences between groups.
